# Supplementary figures and images for: Batch and continuous biogenic hydrogen fermentation of acid pretreated de-oiled jatropha waste (DJW) hydrolysate
Source: Royal Society of Chemistry journal article supplement (doi:10.1039/c6ra05628h), 2016-01-01

### Supplementary Figure

Fig S1. SEM images of the (a) raw DJW, (b) acid pre-treated UHB of DJW

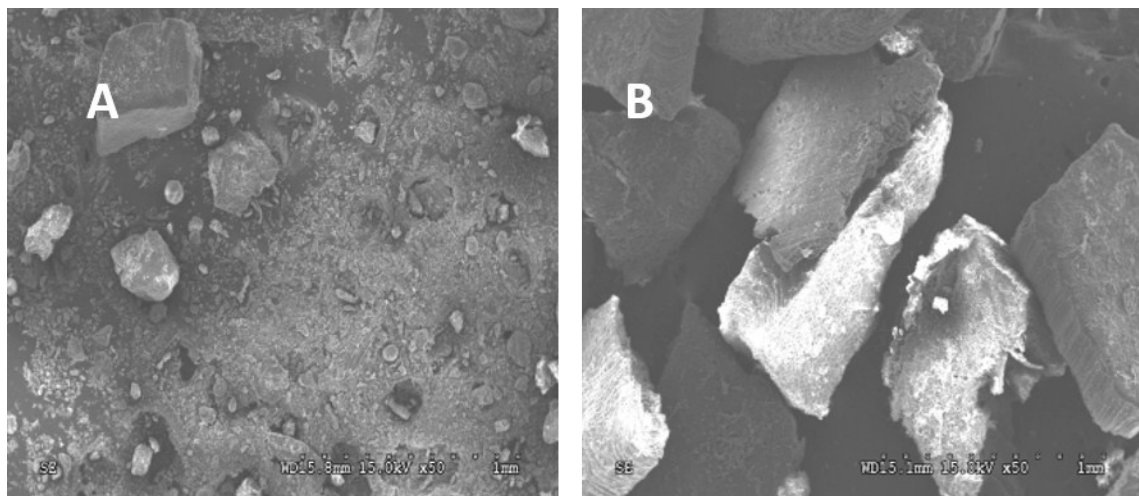

**Fig. S1**

Supplement: c6ra05628h1.pdf [file c6ra05628h1.pdf]
